# Supplementary material for: Uncovering Divergence in Gene Expression Regulation in the Adaptation of Yeast to Nitrogen Scarcity
Source: PubMed Central journal article supplement (PMC8407396; doi:10.1128/msystems.00466-21), 2021-08-24

**A****WExNA\_SM300\_R1 fragment sizes**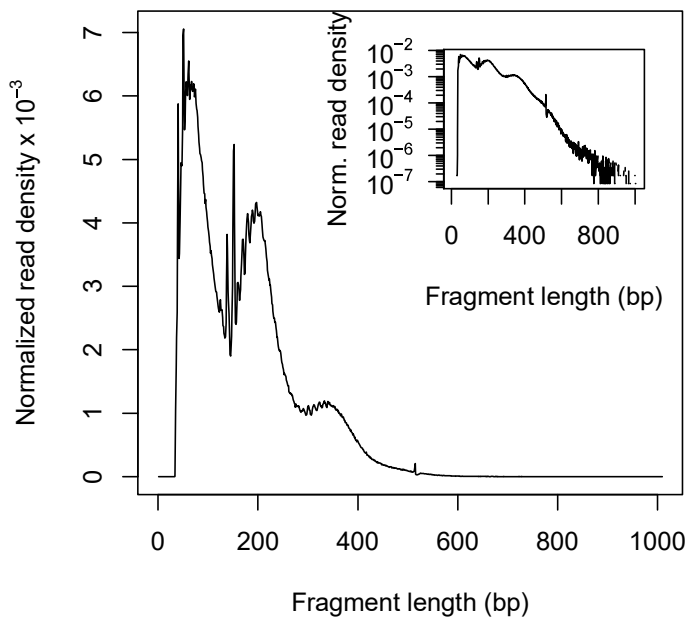**WExNA\_SM60\_R1 fragment sizes**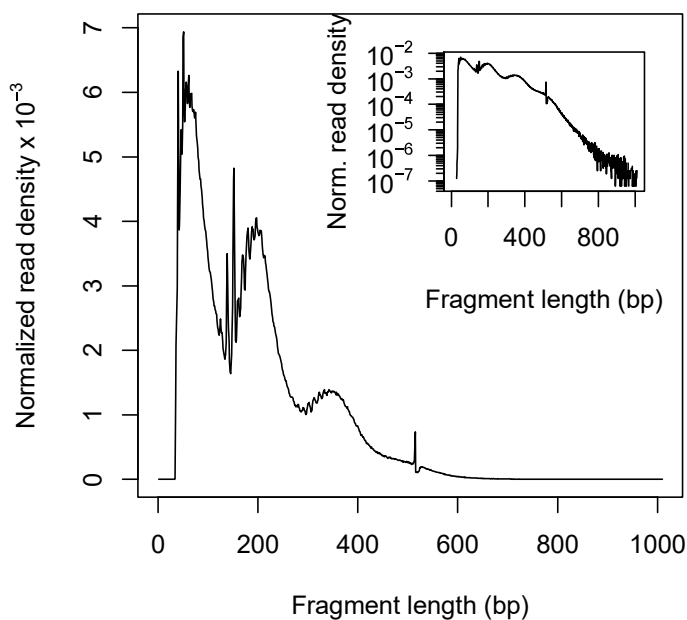**WExNA\_SM300\_R1 fragment sizes**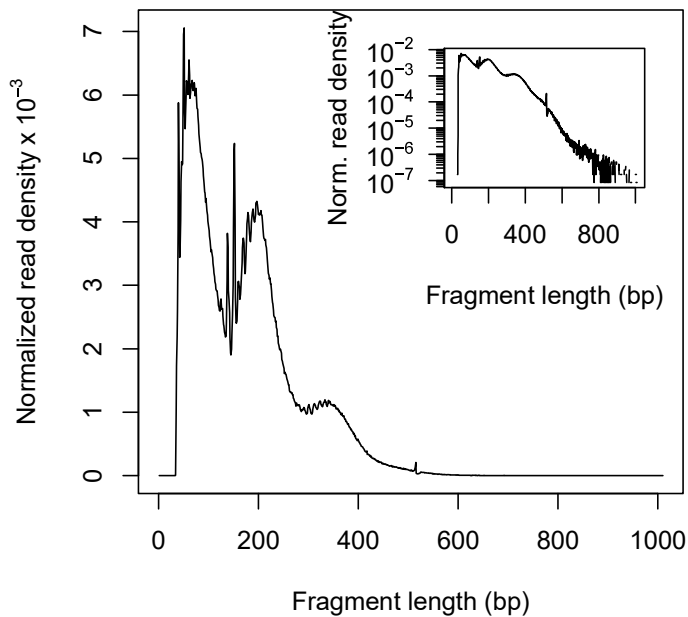**WExNA\_SM60\_R2 fragment sizes**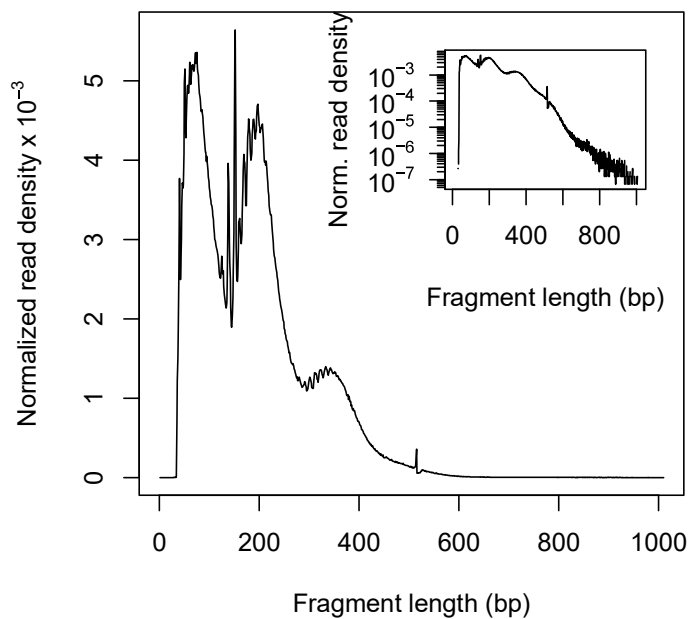**B**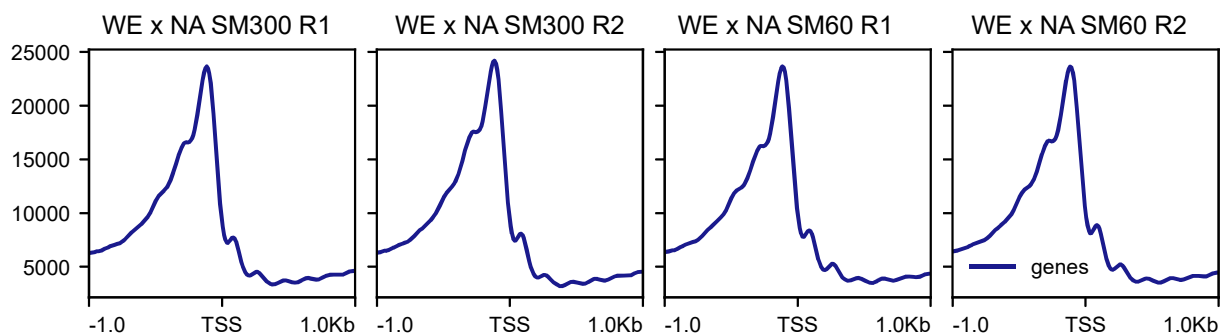

Supplement: msystems.00466-21-sf001.pdf [file msystems.00466-21-sf001.pdf]
