# Supplementary material for: Uncovering Divergence in Gene Expression Regulation in the Adaptation of Yeast to Nitrogen Scarcity
Source: PubMed Central journal article supplement (PMC8407396; doi:10.1128/msystems.00466-21), 2021-08-24

**A****Enriched GO terms for common DEGs and DARs**

## Upregulated in SM60

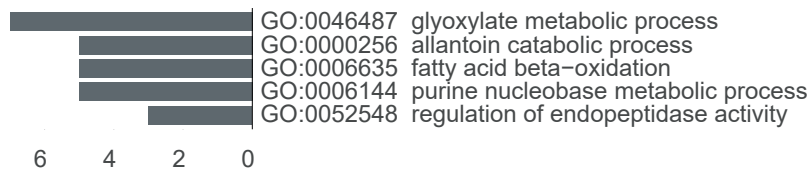

## Downregulated in SM60

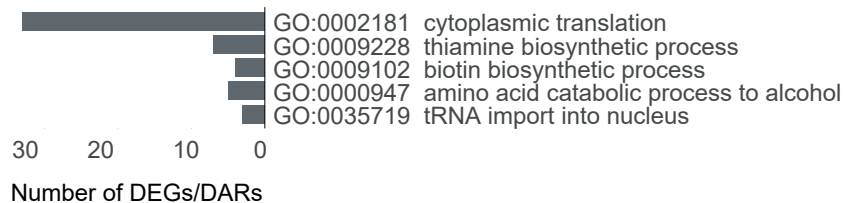**B****Enriched GO terms for DEGs not in DARs**

## Upregulated in SM60

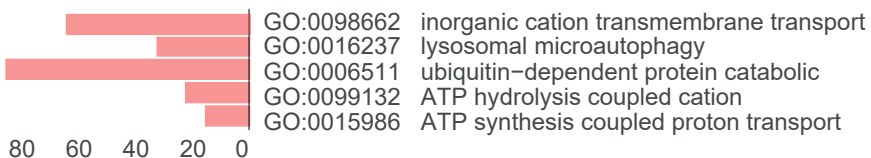

## Downregulated in SM60

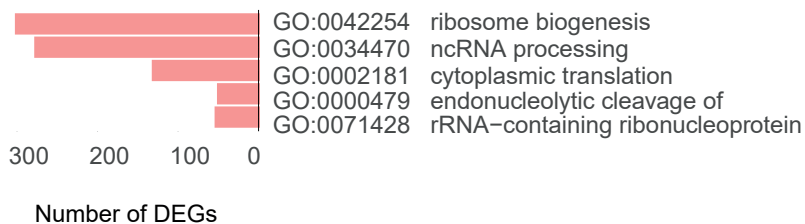**C****Enriched GO terms for DARs not in DEGs**

## Upregulated in SM60

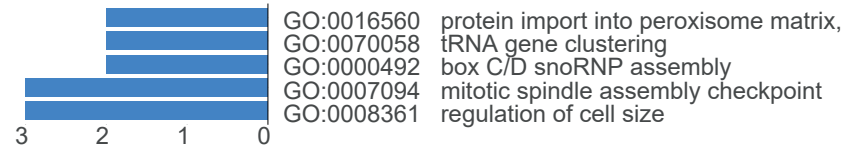

## Downregulated in SM60

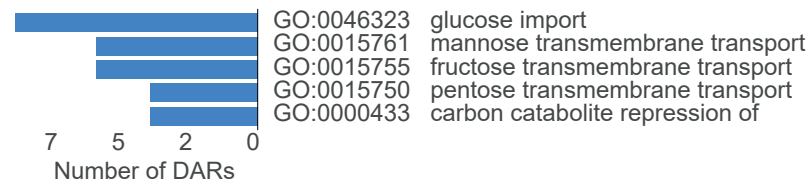**D Enriched GO terms for DARs and DEGs occurring in different directions**

## DARs downregulated in SM60 &amp; DEGs upregulated in SM60

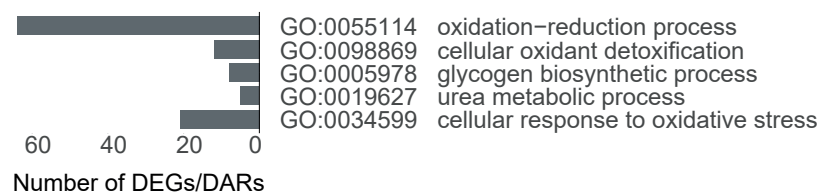

Supplement: msystems.00466-21-sf002.pdf [file msystems.00466-21-sf002.pdf]
