# Supplementary material for: Uncovering Divergence in Gene Expression Regulation in the Adaptation of Yeast to Nitrogen Scarcity
Source: PubMed Central journal article supplement (PMC8407396; doi:10.1128/msystems.00466-21), 2021-08-24

**A**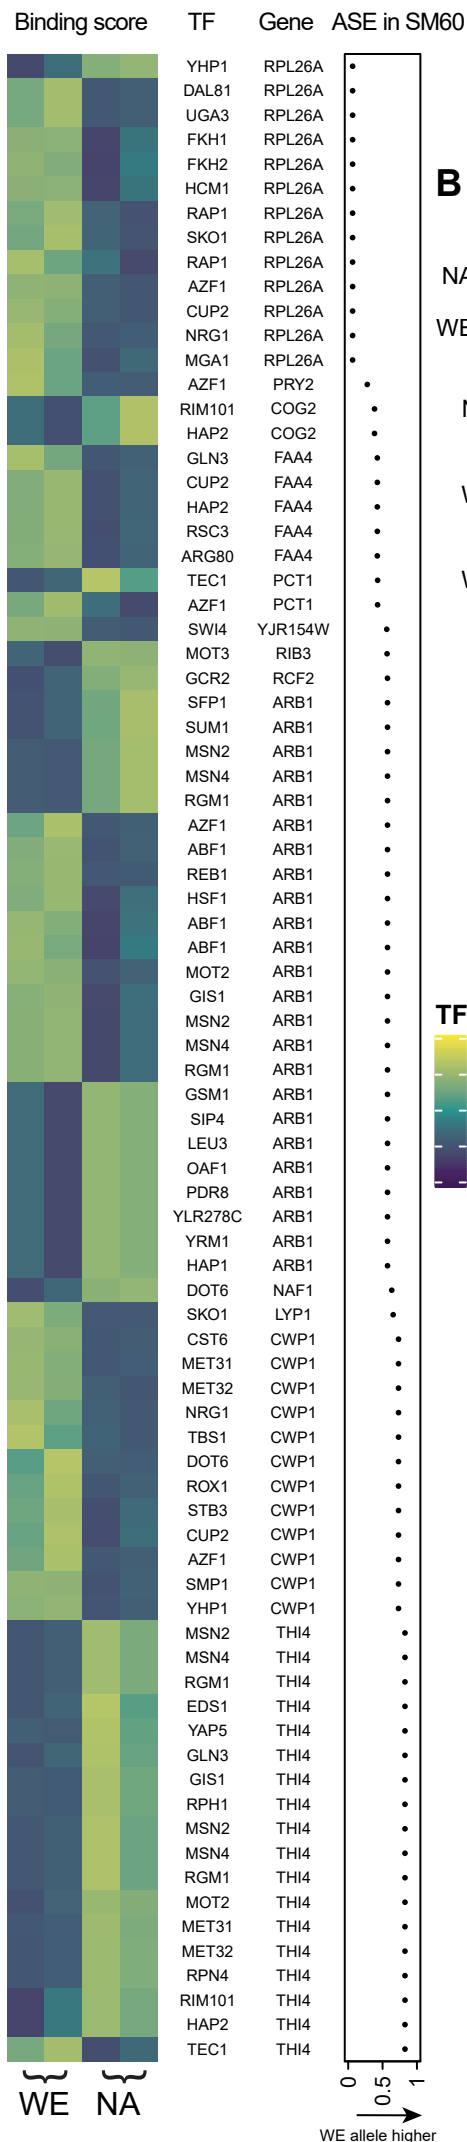**B**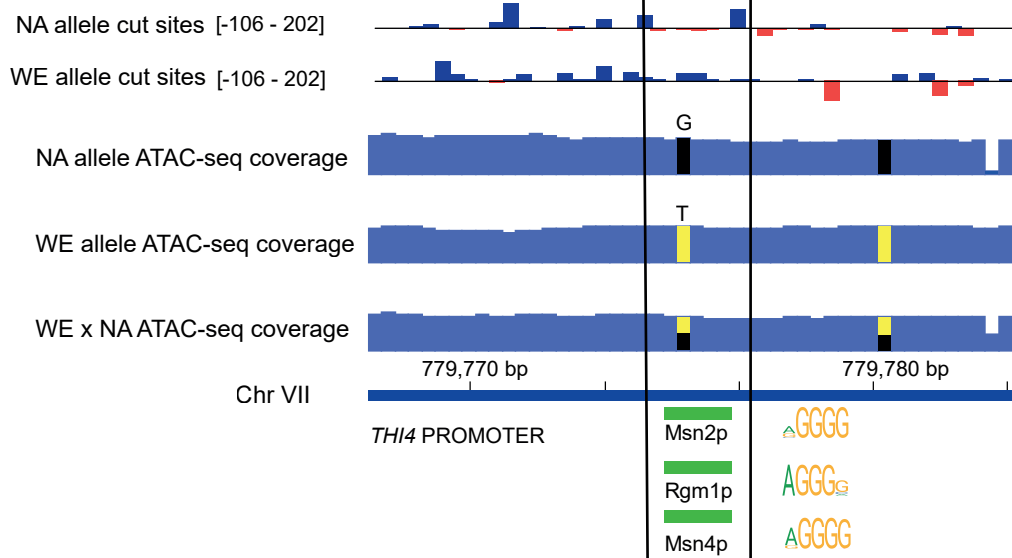**TF score**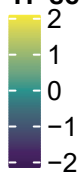

Supplement: msystems.00466-21-sf003.pdf [file msystems.00466-21-sf003.pdf]
